# Supplementary material for: Citrus Bergamia and Cynara Cardunculus Reduce Serum Uric Acid in Individuals with Non-Alcoholic Fatty Liver Disease
Source: MDPI journal article supplement (doi:10.3390/medicina58121728), 2022-11-26
Supplement: s1 [file s1]

**Supplemental Table S1. Baseline clinical characteristics of participants who taking the nutraceutical according to the tertiles of serum uric acid at baseline.**

| Variables                  | I Tertile<br>(n=15) | II Tertile<br>(n=16) | III Tertile<br>(n=16) | <i>p</i><br>ANOVA | <i>p</i> Post-Hoc Analysis        |
|----------------------------|---------------------|----------------------|-----------------------|-------------------|-----------------------------------|
| <b>SUA (mg/dL, range)</b>  | 3.8-4.4             | 4.7-5.3              | 5.4-6.5               |                   |                                   |
| Age (years)                | 49±7                | 53±10                | 54±9                  | 0.25              | -                                 |
| Weight (Kg)                | 72±13               | 81±10                | 86±11                 | 0.009             | I vs II 0.039<br>I vs III 0.002   |
| BMI (Kg/m <sup>2</sup> )   | 28.5±4              | 29.2±3               | 29.7±3                | 0.58              | -                                 |
| WHR                        | 0.89±0.1            | 1.49±2.1             | 0.97±0.1              | 0.33              | -                                 |
| Glucose (mg/dL)            | 89±7                | 92±9                 | 95±4                  | 0.045             | I vs III 0.013                    |
| TC (mg/dL)                 | 189±28              | 191±39               | 185±34                | 0.89              | -                                 |
| TG (mg/dL)                 | 87±40               | 110±50               | 107±47                | 0.31              | -                                 |
| HDL-C (mg/dL)              | 56±13               | 51±14                | 51±10                 | 0.40              | -                                 |
| LDL-C (mg/dL)              | 115±26              | 118±36               | 113±32                | 0.90              | -                                 |
| AST (IU/L)                 | 19±5                | 21±6                 | 22±8                  | 0.51              | -                                 |
| ALT (IU/L)                 | 20±11               | 26±15                | 25±11                 | 0.34              | -                                 |
| γGT (UI/L)                 | 24±20               | 26±20                | 26±14                 | 0.96              | -                                 |
| Creatinine (mg/dL)         | 0.67±0.1            | 0.87±0.1             | 0.89±0.1              | <0.001            | I vs II <0.001<br>I vs III <0.001 |
| <b>Prevalence</b>          |                     |                      |                       |                   |                                   |
| Gender (Male, %)           | 13                  | 69                   | 81                    | <0.001            | -                                 |
| Physical activity (%)      | 53                  | 50                   | 44                    | 0.59              | -                                 |
| Smokers (%)                | 13                  | 38                   | 31                    | 0.27              | -                                 |
| Obesity (%)                | 28                  | 37                   | 31                    | 0.16              | -                                 |
| NAFLD S3 (%)               | 40                  | 69                   | 38                    | 0.16              | -                                 |
| Hypertension (%)           | 20                  | 25                   | 56                    | 0.034             | -                                 |
| Hyperlipidemia (%)         | 20                  | 56                   | 60                    | 0.030             | -                                 |
| Antihypertensive drugs (%) | 13                  | 19                   | 56                    | 0.009             | -                                 |
| Beta-blockers (%)          | 7                   | 6                    | 6                     | 0.96              | -                                 |
| Diuretics (%)              | 0                   | 0                    | 31                    | 0.005             | -                                 |
| Lipid-lowering agents (%)  | 7                   | 13                   | 31                    | 0.07              | -                                 |
| Antiplatelet agents (%)    | 7                   | 13                   | 13                    | 0.60              | -                                 |
| Urate-lowering drugs (%)   | 0                   | 0                    | 0                     | -                 | -                                 |

*Note.* BMI = body mass index, WHR = waist to hip ratio, TC = total cholesterol, TG = triglycerides, HDL-C = high density lipoprotein cholesterol, LDL-C = low density lipoprotein cholesterol, AST = aspartate aminotransferase, ALT = alanine aminotransferase,  $\gamma$ GT = gamma glutamyltransferase, SUA = serum uric acid.

**Supplemental Table S2. Changes in clinical parameters after 6 weeks of participants who taking the nutraceutical according to the tertiles of serum uric acid at baseline.**

| Variables                | I Tertile<br>(n=15) | II Tertile<br>(n=16) | III Tertile<br>(n=16) | <i>p</i><br>ANOVA | <i>p</i> Post-Hoc Analysis |
|--------------------------|---------------------|----------------------|-----------------------|-------------------|----------------------------|
| SUA (mg/dL, range)       | 3.8-4.4             | 4.7-5.3              | 5.4-6.5               |                   |                            |
| Weight (Kg)              | -2.0 $\pm$ 2.6      | -3.6 $\pm$ 1.6       | -3.5 $\pm$ 2.4        | 0.12              | -                          |
| BMI (Kg/m <sup>2</sup> ) | -0.8 $\pm$ 1.0      | -1.3 $\pm$ 0.6       | -1.2 $\pm$ 0.8        | 0.20              | -                          |
| WHR                      | 0.002 $\pm$ 0.04    | -0.54 $\pm$ 2.1      | -0.02 $\pm$ 0.04      | 0.39              | -                          |
| Glucose (mg/dL)          | 0.7 $\pm$ 7         | -1.0 $\pm$ 8         | -1.4 $\pm$ 5          | 0.65              | -                          |
| TG (mg/dL)               | 4 $\pm$ 38          | 10 $\pm$ 46          | -5 $\pm$ 51           | 0.66              | -                          |
| HDL-C (mg/dL)            | -2.6 $\pm$ 6        | -3.7 $\pm$ 4         | -2.9 $\pm$ 7          | 0.84              | -                          |
| LDL-C (mg/dL)            | -8 $\pm$ 26         | -13 $\pm$ 15         | -1 $\pm$ 15           | 0.23              | -                          |
| AST (IU/L)               | -1.3 $\pm$ 3        | -2.4 $\pm$ 5         | 0.2 $\pm$ 9           | 0.52              | -                          |
| ALT (IU/L)               | -0.1 $\pm$ 3        | -4.9 $\pm$ 8         | -2.9 $\pm$ 4          | 0.42              | -                          |
| $\gamma$ GT (UI/L)       | -3.5 $\pm$ 8        | -7.8 $\pm$ 11        | -6.7 $\pm$ 9          | 0.06              | I vs II 0.01               |
| Creatinine (mg/dL)       | -0.01 $\pm$ 0.08    | -0.03 $\pm$ 0.05     | 0.03 $\pm$ 0.06       | 0.05              | II vs III 0.01             |
| SUA (%)                  | 5.1 $\pm$ 12        | -3.0 $\pm$ 9         | -4.9 $\pm$ 16         | 0.07              | I vs III 0.03              |

*Note.* BMI = body mass index, WHR = waist to hip ratio, TC = total cholesterol, TG = triglycerides, HDL-C = high density lipoprotein cholesterol, LDL-C = low density lipoprotein cholesterol, AST = aspartate aminotransferase, ALT = alanine aminotransferase,  $\gamma$ GT = gamma glutamyltransferase, SUA = serum uric acid.
